# Supplementary material for: Human Quadrupeds, Primate Quadrupedalism, and Uner Tan Syndrome
Source: PLoS One. 2014 Jul 16;9(7):e101758. doi: 10.1371/journal.pone.0101758 (PMC4100729; doi:10.1371/journal.pone.0101758)
Supplement: Dataset S1 — Kinematic variables for all participants/strides. (XLSX) [file pone.0101758.s002.xlsx]

## Sheet: Dataset S1new
Participant	Sex	Source	Right forelimb duty factor	Left forelimb duty factor	Right hind limb duty factor	Left hind limb duty factor	Mean duty factor	Forelimb symmetry	Hind limb symmetry	Limb phase	Gait category as defined in Cartmill et al. 2002 (see text and Table S1)	Gait category as defined in Hildebrand 1976 (see text and Table S1)
1	m	Family A	0.48	0.5	0.87	0.88	0.68	0.46	0.52	0.6	DSDC	DSDC
1	m	Family A	0.72	0.54	0.76	0.58	0.65	0.45	0.44	0.51	DSDC	TROT
1	m	Family A	0.72	0.68	0.78	0.77	0.74	0.53	0.5	0.29	LSDC	LSSF
1	m	Family A	0.74	0.73	0.8	0.82	0.77	0.53	0.47	0.34	LSDC	LSDC
1	m	Family A	0.63	0.69	0.78	0.84	0.73	0.56	0.43	0.35	LSDC	LSDC
1	m	Family A	0.69	0.69	0.82	0.78	0.75	0.54	0.55	0.35	LSDC	LSDC
1	m	Family A	0.69	0.72	0.77	0.75	0.73	0.5	0.53	0.3	LSDC	LSSF
1	m	Family A	0.66	0.7	0.71	0.62	0.67	0.47	0.5	0.31	LSDC	LSSF
1	m	Family A	0.64	0.69	0.7	0.57	0.65	0.41	0.46	0.34	LSDC	LSDC
1	m	Family A	0.76	0.64	0.65	0.72	0.69	0.42	0.5	0.37	LSDC	LSDC
1	m	Family A	0.76	0.58	0.61	0.7	0.66	0.48	0.46	0.37	LSDC	LSDC
1	m	Family A	0.78	0.63	0.67	0.69	0.69	0.48	0.5	0.41	LSDC	LSDC
1	m	Family A	0.71	0.55	0.73	0.71	0.67	0.48	0.48	0.34	LSDC	LSDC
1	m	Family A	0.75	0.67	0.72	0.66	0.7	0.45	0.47	0.33	LSDC	LSDC
1	m	Family A	0.68	0.76	0.67	0.67	0.69	0.48	0.52	0.28	LSDC	LSSF
1	m	Family A	0.74	0.71	0.81	0.67	0.73	0.46	0.55	0.28	LSDC	LSSF
1	m	Family A	0.69	0.68	0.67	0.73	0.69	0.45	0.47	0.37	LSDC	LSDC
1	m	Family A	0.7	0.63	0.62	0.68	0.66	0.5	0.48	0.28	LSDC	LSSF
1	m	Family A	0.71	0.75	0.63	0.75	0.71	0.53	0.52	0.26	LSDC	LSSF
1	m	Family A	0.68	0.75	0.74	0.7	0.72	0.51	0.51	0.31	LSDC	LSDC
1	m	Family A	0.69	0.68	0.69	0.73	0.69	0.47	0.45	0.26	LSDC	LSSF
1	m	Family A	0.63	0.69	0.76	0.69	0.69	0.56	0.52	0.27	LSDC	LSSF
1	m	Family A	0.66	0.63	0.78	0.7	0.69	0.56	0.58	0.32	LSDC	LSDC
1	m	Family A	0.68	0.57	0.64	0.56	0.61	0.48	0.54	0.29	LSDC	LSSF
1	m	Family A	0.77	0.74	0.85	0.78	0.79	0.56	0.53	0.38	LSDC	LSDC
1	m	Family A	0.76	0.73	0.74	0.77	0.75	0.47	0.42	0.34	LSDC	LSDC
1	m	Family A	0.79	0.74	0.75	0.79	0.77	0.53	0.46	0.27	LSDC	LSSF
1	m	Family A	0.73	0.7	0.67	0.69	0.7	0.53	0.47	0.29	LSDC	LSSF
1	m	Family A	0.71	0.74	0.68	0.76	0.72	0.5	0.45	0.27	LSDC	LSSF
1	m	Family A	0.73	0.74	0.74	0.82	0.76	0.55	0.48	0.29	LSDC	LSSF
1	m	Family A	0.74	0.7	0.64	0.77	0.71	0.5	0.43	0.31	LSDC	LSDC
1	m	Family A	0.72	0.75	0.64	0.69	0.7	0.55	0.48	0.3	LSDC	LSSF
1	m	Family A	0.77	0.63	0.69	0.7	0.7	0.52	0.53	0.26	LSDC	LSSF
1	m	Family A	0.71	0.73	0.66	0.78	0.72	0.51	0.46	0.3	LSDC	LSSF
1	m	Family A	0.65	0.7	0.72	0.83	0.72	0.49	0.47	0.29	LSDC	LSSF
1	m	Family A	0.69	0.7	0.79	0.92	0.77	0.53	0.55	0.33	LSDC	LSDC
1	m	Family A	0.76	0.72	0.83	0.8	0.78	0.54	0.59	0.36	LSDC	LSDC
1	m	Family A	0.75	0.64	0.77	0.73	0.72	0.43	0.53	0.39	LSDC	LSDC
1	m	Family A	0.78	0.71	0.85	0.72	0.77	0.51	0.55	0.37	LSDC	LSDC
1	m	Family A	0.76	0.65	0.78	0.85	0.76	0.52	0.49	0.34	LSDC	LSDC
1	m	Family A	0.7	0.71	0.76	0.73	0.73	0.49	0.44	0.36	LSDC	LSDC
1	m	Family A	0.78	0.79	0.77	0.78	0.78	0.46	0.49	0.35	LSDC	LSDC
1	m	Family A	0.69	0.58	0.63	0.69	0.65	0.48	0.5	0.31	LSDC	LSSF
1	m	Family A	0.71	0.7	0.65	0.71	0.69	0.44	0.48	0.27	LSDC	LSSF
1	m	Family A	0.65	0.65	0.7	0.67	0.66	0.45	0.5	0.29	LSDC	LSSF
1	m	Family A	0.68	0.71	0.64	0.68	0.68	0.5	0.52	0.28	LSDC	LSSF
1	m	Family A	0.71	0.74	0.67	0.83	0.73	0.49	0.46	0.39	LSDC	LSDC
1	m	Family A	0.72	0.63	0.66	0.63	0.66	0.59	0.53	0.3	LSDC	LSSF
1	m	Family A	0.81	0.62	0.68	0.68	0.69	0.5	0.48	0.26	LSDC	LSSF
1	m	Family A	0.78	0.62	0.71	0.63	0.69	0.54	0.5	0.28	LSDC	LSSF
1	m	Family A	0.75	0.58	0.64	0.62	0.65	0.54	0.45	0.3	LSDC	LSSF
1	m	Family A	0.82	0.79	0.85	0.75	0.8	0.49	0.42	0.36	LSDC	LSDC
1	m	Family A	0.82	0.74	0.79	0.78	0.78	0.56	0.54	0.34	LSDC	LSDC
1	m	Family A	0.83	0.8	0.83	0.71	0.79	0.44	0.45	0.32	LSDC	LSDC
1	m	Family A	0.77	0.77	0.8	0.65	0.75	0.48	0.47	0.27	LSDC	LSSF
1	m	Family A	0.78	0.76	0.7	0.75	0.75	0.51	0.51	0.37	LSDC	LSDC
1	m	Family A	0.69	0.72	0.71	0.64	0.69	0.56	0.56	0.35	LSDC	LSDC
1	m	Family A	0.75	0.75	0.71	0.56	0.69	0.52	0.46	0.39	LSDC	LSDC
1	m	Family A	0.7	0.7	0.75	0.54	0.67	0.46	0.45	0.38	LSDC	LSDC
1	m	Family A	0.73	0.64	0.63	0.44	0.61	0.5	0.5	0.26	LSDC	LSSF
1	m	Family A	0.63	0.63	0.63	0.46	0.59	0.42	0.48	0.29	LSDC	LSSF
1	m	Family A	0.76	0.6	0.62	0.54	0.63	0.48	0.52	0.26	LSDC	LSSF
1	m	Family A	0.68	0.52	0.56	0.48	0.56	0.52	0.56	0.27	LSDC	LSSF
1	m	Family A	0.68	0.63	0.6	0.5	0.6	0.48	0.48	0.26	LSDC	LSSF
1	m	Family A	0.71	0.71	0.65	0.6	0.67	0.54	0.43	0.36	LSDC	LSDC
1	m	Family A	0.79	0.76	0.85	0.88	0.82	0.54	0.47	0.4	LSDC	LSDC
1	m	Family A	0.83	0.72	0.87	0.84	0.81	0.51	0.44	0.38	LSDC	LSDC
1	m	Family A	0.84	0.78	0.86	0.77	0.81	0.53	0.45	0.34	LSDC	LSDC
1	m	Family A	0.86	0.81	0.88	0.85	0.85	0.48	0.44	0.36	LSDC	LSDC
1	m	Family A	0.74	0.68	0.72	0.76	0.73	0.51	0.5	0.28	LSDC	LSSF
1	m	Family A	0.7	0.74	0.74	0.75	0.73	0.45	0.46	0.29	LSDC	LSSF
1	m	Family A	0.76	0.67	0.79	0.74	0.74	0.58	0.46	0.27	LSDC	LSSF
1	m	Family A	0.81	0.8	0.76	0.77	0.79	0.49	0.45	0.27	LSDC	LSSF
1	m	Family A	0.74	0.77	0.74	0.71	0.74	0.5	0.47	0.27	LSDC	LSSF
1	m	Family A	0.76	0.77	0.79	0.72	0.76	0.5	0.48	0.38	LSDC	LSDC
1	m	Family A	0.71	0.71	0.71	0.69	0.71	0.5	0.54	0.31	LSDC	LSSF
1	m	Family A	0.74	0.74	0.79	0.76	0.76	0.53	0.55	0.32	LSDC	LSDC
1	m	Family A	0.74	0.71	0.73	0.73	0.73	0.54	0.47	0.36	LSDC	LSDC
1	m	Family A	0.69	0.7	0.76	0.8	0.74	0.51	0.52	0.32	LSDC	LSDC
1	m	Family A	0.73	0.71	0.71	0.75	0.72	0.5	0.49	0.37	LSDC	LSDC
1	m	Family A	0.7	0.72	0.72	0.78	0.73	0.52	0.47	0.34	LSDC	LSDC
1	m	Family A	0.77	0.72	0.72	0.74	0.74	0.49	0.44	0.32	LSDC	LSDC
1	m	Family A	0.74	0.69	0.76	0.76	0.74	0.5	0.49	0.32	LSDC	LSDC
1	m	Family A	0.74	0.71	0.73	0.72	0.73	0.48	0.48	0.34	LSDC	LSDC
1	m	Family A	0.76	0.75	0.72	0.75	0.74	0.53	0.49	0.34	LSDC	LSDC
1	m	Family A	0.72	0.69	0.63	0.75	0.7	0.54	0.53	0.3	LSDC	LSSF
1	m	Family A	0.78	0.71	0.74	0.73	0.74	0.53	0.45	0.31	LSDC	LSSF
1	m	Family A	0.7	0.73	0.74	0.75	0.73	0.5	0.5	0.33	LSDC	LSDC
1	m	Family A	0.68	0.66	0.73	0.68	0.69	0.5	0.49	0.37	LSDC	LSDC
1	m	Family A	0.81	0.76	0.8	0.81	0.79	0.52	0.51	0.35	LSDC	LSDC
1	m	Family A	0.74	0.69	0.63	0.74	0.7	0.54	0.45	0.34	LSDC	LSDC
1	m	Family A	0.74	0.68	0.68	0.68	0.69	0.55	0.48	0.26	LSDC	LSSF
1	m	Family A	0.65	0.64	0.63	0.67	0.65	0.54	0.48	0.28	LSDC	LSSF
1	m	Family A	0.72	0.73	0.68	0.68	0.7	0.5	0.54	0.3	LSDC	LSSF
1	m	Family A	0.76	0.63	0.73	0.71	0.71	0.5	0.54	0.34	LSDC	LSDC
1	m	Family A	0.73	0.7	0.75	0.73	0.73	0.48	0.54	0.37	LSDC	LSDC
1	m	Family A	0.77	0.71	0.75	0.7	0.73	0.51	0.52	0.35	LSDC	LSDC
1	m	Family A	0.74	0.68	0.79	0.7	0.73	0.5	0.55	0.32	LSDC	LSDC
1	m	Family A	0.8	0.7	0.76	0.79	0.76	0.5	0.49	0.33	LSDC	LSDC
1	m	Family A	0.73	0.63	0.69	0.67	0.68	0.51	0.51	0.3	LSDC	LSSF
1	m	Family A	0.73	0.7	0.75	0.77	0.74	0.49	0.49	0.3	LSDC	LSSF
1	m	Family A	0.8	0.71	0.78	0.7	0.75	0.5	0.54	0.31	LSDC	LSSF
1	m	Family A	0.76	0.67	0.74	0.72	0.72	0.53	0.51	0.34	LSDC	LSDC
1	m	Family A	0.75	0.69	0.76	0.68	0.72	0.47	0.59	0.34	LSDC	LSDC
1	m	Family A	0.76	0.76	0.74	0.64	0.73	0.5	0.46	0.45	LSDC	TROT
1	m	Family A	0.79	0.8	0.93	0.86	0.84	0.51	0.5	0.36	LSDC	LSDC
1	m	Family A	0.81	0.79	0.84	0.88	0.83	0.44	0.49	0.35	LSDC	LSDC
1	m	Family A	0.81	0.71	0.85	0.85	0.81	0.43	0.47	0.36	LSDC	LSDC
1	m	Family A	0.67	0.61	0.66	0.63	0.64	0.45	0.55	0.26	LSDC	LSSF
1	m	Family A	0.73	0.61	0.75	0.66	0.69	0.47	0.45	0.27	LSDC	LSSF
1	m	Family A	0.73	0.7	0.63	0.63	0.67	0.43	0.48	0.31	LSDC	LSDC
1	m	Family A	0.67	0.71	0.65	0.63	0.66	0.44	0.53	0.26	LSDC	LSSF
1	m	Family A	0.73	0.74	0.77	0.84	0.77	0.56	0.59	0.29	LSDC	LSSF
1	m	Family A	0.71	0.78	0.81	0.69	0.75	0.5	0.49	0.35	LSDC	LSDC
1	m	Family A	0.68	0.71	0.8	0.71	0.73	0.5	0.5	0.3	LSDC	LSSF
1	m	Family A	0.73	0.71	0.82	0.82	0.77	0.54	0.51	0.34	LSDC	LSDC
1	m	Family A	0.75	0.76	0.8	0.72	0.76	0.46	0.43	0.35	LSDC	LSDC
1	m	Family A	0.69	0.73	0.76	0.77	0.74	0.52	0.51	0.36	LSDC	LSDC
1	m	Family A	0.74	0.75	0.84	0.8	0.78	0.53	0.51	0.36	LSDC	LSDC
1	m	Family A	0.81	0.75	0.85	0.69	0.77	0.49	0.45	0.36	LSDC	LSDC
1	m	Family A	0.71	0.68	0.74	0.61	0.68	0.45	0.49	0.28	LSDC	LSSF
1	m	Family A	0.77	0.75	0.64	0.67	0.71	0.44	0.5	0.29	LSDC	LSSF
1	m	Family A	0.74	0.68	0.79	0.72	0.73	0.47	0.5	0.28	LSDC	LSSF
1	m	Family A	0.73	0.7	0.74	0.82	0.75	0.52	0.58	0.35	LSDC	LSDC
1	m	Family A	0.8	0.77	0.72	0.83	0.78	0.46	0.49	0.36	LSDC	LSDC
1	m	Family A	0.74	0.72	0.67	0.74	0.72	0.47	0.49	0.32	LSDC	LSDC
1	m	Family A	0.73	0.68	0.73	0.72	0.71	0.49	0.54	0.32	LSDC	LSDC
1	m	Family A	0.71	0.7	0.7	0.7	0.7	0.49	0.53	0.33	LSDC	LSDC
1	m	Family A	0.78	0.73	0.73	0.68	0.73	0.53	0.55	0.32	LSDC	LSDC
1	m	Family A	0.68	0.71	0.74	0.71	0.71	0.5	0.49	0.33	LSDC	LSDC
1	m	Family A	0.78	0.75	0.77	0.74	0.76	0.51	0.55	0.32	LSDC	LSDC
1	m	Family A	0.76	0.76	0.79	0.74	0.76	0.54	0.53	0.38	LSDC	LSDC
1	m	Family A	0.79	0.73	0.78	0.68	0.74	0.54	0.55	0.33	LSDC	LSDC
1	m	Family A	0.78	0.74	0.79	0.74	0.77	0.55	0.52	0.35	LSDC	LSDC
1	m	Family A	0.77	0.76	0.78	0.76	0.77	0.53	0.5	0.35	LSDC	LSDC
1	m	Family A	0.55	0.64	0.59	0.65	0.61	0.58	0.46	0.34	LSDC	LSDC
1	m	Family A	0.64	0.6	0.58	0.6	0.6	0.5	0.48	0.29	LSDC	LSSF
1	m	Family A	0.57	0.57	0.59	0.59	0.58	0.5	0.48	0.33	LSDC	LSDC
1	m	Family A	0.58	0.65	0.65	0.64	0.63	0.5	0.54	0.27	LSDC	LSSF
1	m	Family A	0.56	0.54	0.59	0.56	0.56	0.48	0.48	0.33	LSDC	LSDC
1	m	Family A	0.82	0.7	0.66	0.63	0.7	0.5	0.52	0.27	LSDC	LSSF
1	m	Family A	0.82	0.73	0.84	0.9	0.82	0.48	0.5	0.36	LSDC	LSDC
1	m	Family A	0.8	0.73	0.82	0.83	0.8	0.48	0.49	0.36	LSDC	LSDC
1	m	Family A	0.75	0.71	0.79	0.69	0.74	0.52	0.58	0.39	LSDC	LSDC
1	m	Family A	0.82	0.78	0.83	0.77	0.8	0.49	0.52	0.38	LSDC	LSDC
1	m	Family A	0.71	0.83	0.86	0.81	0.8	0.56	0.46	0.39	LSDC	LSDC
1	m	Family A	0.78	0.78	0.78	0.68	0.76	0.47	0.47	0.35	LSDC	LSDC
1	m	Family A	0.71	0.82	0.87	0.81	0.8	0.52	0.46	0.36	LSDC	LSDC
1	m	Family A	0.74	0.75	0.76	0.76	0.75	0.47	0.57	0.31	LSDC	LSSF
1	m	Family A	0.71	0.73	0.76	0.76	0.74	0.54	0.57	0.34	LSDC	LSDC
1	m	Family A	0.81	0.77	0.81	0.76	0.79	0.5	0.55	0.32	LSDC	LSDC
1	m	Family A	0.7	0.74	0.71	0.73	0.72	0.5	0.49	0.36	LSDC	LSDC
1	m	Family A	0.73	0.7	0.76	0.8	0.74	0.57	0.48	0.31	LSDC	LSSF
1	m	Family A	0.8	0.77	0.83	0.8	0.8	0.48	0.41	0.37	LSDC	LSDC
1	m	Family A	0.76	0.8	0.74	0.74	0.76	0.48	0.46	0.34	LSDC	LSDC
1	m	Family A	0.73	0.73	0.71	0.73	0.72	0.45	0.5	0.31	LSDC	LSSF
1	m	Family A	0.74	0.69	0.65	0.68	0.69	0.45	0.49	0.3	LSDC	LSSF
1	m	Family A	0.75	0.67	0.69	0.71	0.7	0.4	0.47	0.27	LSDC	LSSF
1	m	Family A	0.71	0.67	0.61	0.67	0.66	0.42	0.44	0.26	LSDC	LSSF
1	m	Family A	0.72	0.69	0.7	0.65	0.69	0.44	0.47	0.27	LSDC	LSSF
1	m	Family A	0.82	0.76	0.69	0.71	0.74	0.48	0.46	0.28	LSDC	LSSF
1	m	Family A	0.75	0.73	0.69	0.69	0.71	0.45	0.47	0.26	LSDC	LSSF
1	m	Family A	0.68	0.72	0.66	0.75	0.7	0.5	0.5	0.27	LSDC	LSSF
1	m	Family A	0.77	0.71	0.71	0.74	0.73	0.47	0.44	0.26	LSDC	LSSF
1	m	Family A	0.75	0.67	0.77	0.71	0.73	0.49	0.42	0.32	LSDC	LSDC
1	m	Family A	0.76	0.76	0.72	0.81	0.76	0.48	0.49	0.35	LSDC	LSDC
1	m	Family A	0.73	0.73	0.76	0.79	0.75	0.44	0.52	0.34	LSDC	LSDC
1	m	Family A	0.74	0.69	0.75	0.82	0.75	0.44	0.45	0.33	LSDC	LSDC
1	m	Family A	0.75	0.76	0.71	0.73	0.73	0.45	0.41	0.3	LSDC	LSSF
1	m	Family A	0.71	0.71	0.64	0.64	0.67	0.47	0.48	0.28	LSDC	LSSF
1	m	Family A	0.7	0.79	0.69	0.77	0.74	0.5	0.49	0.36	LSDC	LSDC
1	m	Family A	0.77	0.67	0.67	0.67	0.69	0.48	0.5	0.27	LSDC	LSSF
1	m	Family A	0.73	0.74	0.66	0.69	0.7	0.44	0.48	0.27	LSDC	LSSF
1	m	Family A	0.71	0.68	0.63	0.66	0.67	0.5	0.48	0.27	LSDC	LSSF
1	m	Family A	0.71	0.64	0.66	0.67	0.67	0.5	0.48	0.26	LSDC	LSSF
1	m	Family A	0.76	0.66	0.7	0.71	0.71	0.5	0.5	0.31	LSDC	LSSF
1	m	Family A	0.77	0.69	0.75	0.72	0.73	0.47	0.46	0.32	LSDC	LSDC
1	m	Family A	0.7	0.71	0.69	0.76	0.71	0.47	0.51	0.29	LSDC	LSSF
1	m	Family A	0.78	0.75	0.73	0.69	0.74	0.51	0.43	0.33	LSDC	LSDC
1	m	Family A	0.72	0.8	0.73	0.61	0.71	0.44	0.48	0.28	LSDC	LSSF
1	m	Family A	0.7	0.79	0.71	0.67	0.71	0.5	0.5	0.28	LSDC	LSSF
1	m	Family A	0.74	0.71	0.71	0.65	0.7	0.46	0.47	0.31	LSDC	LSDC
1	m	Family A	0.75	0.72	0.77	0.67	0.73	0.43	0.5	0.31	LSDC	LSSF
1	m	Family A	0.81	0.72	0.73	0.71	0.74	0.46	0.48	0.3	LSDC	LSSF
1	m	Family A	0.77	0.66	0.71	0.67	0.7	0.46	0.5	0.26	LSDC	LSSF
1	m	Family A	0.76	0.71	0.72	0.71	0.73	0.5	0.51	0.3	LSDC	LSSF
1	m	Family A	0.74	0.7	0.72	0.7	0.72	0.46	0.5	0.29	LSDC	LSSF
1	m	Family A	0.72	0.72	0.71	0.72	0.72	0.5	0.56	0.31	LSDC	LSSF
1	m	Family A	0.77	0.7	0.75	0.73	0.74	0.5	0.44	0.38	LSDC	LSDC
1	m	Family A	0.74	0.71	0.78	0.67	0.73	0.51	0.47	0.35	LSDC	LSDC
1	m	Family A	0.79	0.79	0.73	0.72	0.76	0.49	0.53	0.36	LSDC	LSDC
1	m	Family A	0.82	0.89	0.92	0.86	0.87	0.53	0.52	0.38	LSDC	LSDC
1	m	Family A	0.91	0.83	0.85	0.95	0.89	0.45	0.41	0.4	LSDC	LSDC
1	m	Family A	0.77	0.79	0.82	0.82	0.8	0.47	0.52	0.36	LSDC	LSDC
1	m	Family A	0.84	0.86	0.86	0.87	0.85	0.45	0.46	0.36	LSDC	LSDC
1	m	Family A	0.83	0.87	0.82	0.84	0.84	0.52	0.46	0.34	LSDC	LSDC
1	m	Family A	0.77	0.78	0.63	0.75	0.73	0.49	0.49	0.37	LSDC	LSDC
1	m	Family A	0.76	0.82	0.85	0.84	0.82	0.47	0.54	0.36	LSDC	LSDC
1	m	Family A	0.78	0.86	0.81	0.86	0.83	0.52	0.51	0.38	LSDC	LSDC
1	m	Family A	0.75	0.73	0.77	0.82	0.77	0.48	0.57	0.32	LSDC	LSDC
1	m	Family A	0.81	0.82	0.86	0.75	0.81	0.45	0.41	0.34	LSDC	LSDC
1	m	Family A	0.78	0.8	0.8	0.84	0.81	0.53	0.58	0.34	LSDC	LSDC
1	m	Family A	0.71	0.74	0.81	0.76	0.75	0.48	0.5	0.33	LSDC	LSDC
1	m	Family A	0.79	0.73	0.74	0.74	0.75	0.52	0.46	0.36	LSDC	LSDC
1	m	Family A	0.78	0.72	0.79	0.76	0.76	0.5	0.44	0.35	LSDC	LSDC
1	m	Family A	0.77	0.7	0.72	0.72	0.73	0.54	0.53	0.33	LSDC	LSDC
1	m	Family A	0.75	0.71	0.77	0.81	0.76	0.56	0.55	0.34	LSDC	LSDC
1	m	Family A	0.76	0.77	0.77	0.79	0.77	0.52	0.51	0.37	LSDC	LSDC
1	m	Family A	0.76	0.74	0.84	0.72	0.77	0.51	0.43	0.37	LSDC	LSDC
1	m	Family A	0.74	0.71	0.76	0.76	0.74	0.51	0.52	0.36	LSDC	LSDC
1	m	Family A	0.77	0.74	0.74	0.79	0.76	0.53	0.52	0.36	LSDC	LSDC
1	m	Family A	0.83	0.79	0.79	0.74	0.79	0.52	0.48	0.35	LSDC	LSDC
1	m	Family A	0.74	0.71	0.77	0.76	0.75	0.51	0.49	0.35	LSDC	LSDC
1	m	Family A	0.73	0.73	0.76	0.79	0.75	0.53	0.58	0.38	LSDC	LSDC
1	m	Family A	0.78	0.73	0.76	0.76	0.76	0.49	0.51	0.41	LSDC	LSDC
1	m	Family A	0.7	0.68	0.76	0.74	0.72	0.47	0.49	0.37	LSDC	LSDC
1	m	Family A	0.7	0.68	0.72	0.78	0.72	0.5	0.49	0.39	LSDC	LSDC
1	m	Family A	0.78	0.75	0.75	0.76	0.76	0.49	0.45	0.38	LSDC	LSDC
1	m	Family A	0.73	0.7	0.74	0.79	0.74	0.49	0.47	0.37	LSDC	LSDC
1	m	Family A	0.68	0.72	0.73	0.72	0.71	0.49	0.47	0.38	LSDC	LSDC
1	m	Family A	0.69	0.69	0.69	0.76	0.71	0.5	0.54	0.3	LSDC	LSSF
1	m	Family A	0.74	0.7	0.74	0.76	0.73	0.51	0.54	0.34	LSDC	LSDC
1	m	Family A	0.76	0.73	0.78	0.72	0.75	0.5	0.48	0.38	LSDC	LSDC
1	m	Family A	0.7	0.68	0.72	0.83	0.73	0.52	0.53	0.35	LSDC	LSDC
1	m	Family A	0.74	0.74	0.81	0.8	0.77	0.52	0.46	0.39	LSDC	LSDC
1	m	Family A	0.77	0.74	0.77	0.82	0.77	0.56	0.57	0.37	LSDC	LSDC
1	m	Family A	0.81	0.77	0.83	0.82	0.81	0.52	0.5	0.38	LSDC	LSDC
1	m	Family A	0.76	0.68	0.68	0.77	0.72	0.5	0.47	0.35	LSDC	LSDC
1	m	Family A	0.68	0.66	0.78	0.85	0.74	0.51	0.46	0.26	LSDC	LSSF
1	m	Family A	0.68	0.71	0.87	0.82	0.77	0.52	0.53	0.29	LSDC	LSSF
1	m	Family A	0.7	0.72	0.86	0.84	0.78	0.51	0.55	0.31	LSDC	LSSF
1	m	Family A	0.69	0.69	0.74	0.88	0.75	0.5	0.46	0.35	LSDC	LSDC
1	m	Family A	0.66	0.65	0.76	0.8	0.72	0.51	0.49	0.35	LSDC	LSDC
1	m	Family A	0.71	0.61	0.8	0.74	0.71	0.5	0.53	0.31	LSDC	LSSF
1	m	Family A	0.71	0.59	0.71	0.7	0.68	0.53	0.47	0.32	LSDC	LSDC
1	m	Family A	0.72	0.66	0.65	0.76	0.7	0.51	0.5	0.26	LSDC	LSSF
1	m	Family A	0.73	0.79	0.74	0.64	0.72	0.52	0.47	0.29	LSDC	LSSF
1	m	Family A	0.66	0.77	0.77	0.65	0.71	0.47	0.5	0.31	LSDC	LSSF
1	m	Family A	0.77	0.8	0.83	0.5	0.72	0.54	0.55	0.32	LSDC	LSDC
1	m	Family A	0.78	0.76	0.86	0.58	0.75	0.45	0.59	0.35	LSDC	LSDC
1	m	Family A	0.68	0.66	0.7	0.64	0.67	0.47	0.47	0.37	LSDC	LSDC
1	m	Family A	0.63	0.7	0.74	0.64	0.68	0.47	0.46	0.35	LSDC	LSDC
1	m	Family A	0.83	0.82	0.74	0.82	0.8	0.46	0.52	0.36	LSDC	LSDC
1	m	Family A	0.8	0.75	0.84	0.81	0.8	0.46	0.46	0.35	LSDC	LSDC
1	m	Family A	0.8	0.87	0.73	0.81	0.8	0.46	0.48	0.35	LSDC	LSDC
1	m	Family A	0.8	0.81	0.71	0.77	0.77	0.46	0.46	0.36	LSDC	LSDC
1	m	Family A	0.73	0.84	0.76	0.8	0.78	0.5	0.51	0.34	LSDC	LSDC
1	m	Family A	0.74	0.77	0.77	0.79	0.77	0.46	0.47	0.35	LSDC	LSDC
1	m	Family A	0.78	0.76	0.74	0.73	0.75	0.51	0.48	0.35	LSDC	LSDC
1	m	Family A	0.64	0.61	0.62	0.62	0.62	0.55	0.57	0.29	LSDC	LSSF
1	m	Family A	0.61	0.61	0.6	0.56	0.59	0.57	0.46	0.3	LSDC	LSSF
1	m	Family A	0.69	0.62	0.67	0.58	0.64	0.54	0.56	0.26	LSDC	LSSF
1	m	Family A	0.75	0.71	0.63	0.68	0.69	0.55	0.47	0.28	LSDC	LSSF
1	m	Family A	0.74	0.72	0.58	0.71	0.69	0.58	0.48	0.27	LSDC	LSSF
1	m	Family A	0.83	0.71	0.83	0.73	0.77	0.48	0.41	0.37	LSDC	LSDC
1	m	Family A	0.76	0.83	0.77	0.7	0.77	0.44	0.49	0.31	LSDC	LSSF
1	m	Family A	0.76	0.8	0.85	0.78	0.8	0.49	0.5	0.33	LSDC	LSDC
1	m	Family A	0.59	0.7	0.64	0.65	0.64	0.5	0.47	0.34	LSDC	LSDC
1	m	Family A	0.58	0.65	0.66	0.71	0.65	0.48	0.5	0.26	LSDC	LSSF
1	m	Family A	0.53	0.76	0.75	0.68	0.68	0.55	0.57	0.3	LSDC	LSSF
1	m	Family A	0.68	0.66	0.78	0.72	0.71	0.5	0.5	0.37	LSDC	LSDC
1	m	Family A	0.66	0.69	0.64	0.67	0.66	0.53	0.44	0.3	LSDC	LSSF
1	m	Family A	0.65	0.62	0.68	0.73	0.67	0.48	0.49	0.3	LSDC	LSSF
1	m	Family A	0.73	0.76	0.72	0.73	0.74	0.54	0.5	0.39	LSDC	LSDC
1	m	Family A	0.76	0.73	0.78	0.73	0.75	0.47	0.47	0.31	LSDC	LSDC
1	m	Family A	0.65	0.68	0.52	0.68	0.63	0.5	0.55	0.22	LSLC	LSSF
1	m	Family A	0.63	0.72	0.61	0.68	0.66	0.56	0.57	0.24	LSLC	LSSF
1	m	Family A	0.69	0.71	0.71	0.72	0.71	0.51	0.5	0.24	LSLC	LSSF
1	m	Family A	0.76	0.57	0.71	0.63	0.67	0.58	0.52	0.21	LSLC	LSSF
1	m	Family A	0.75	0.58	0.66	0.63	0.66	0.5	0.47	0.23	LSLC	LSSF
1	m	Family A	0.7	0.65	0.73	0.58	0.66	0.5	0.53	0.24	LSLC	LSSF
1	m	Family A	0.66	0.66	0.73	0.64	0.67	0.46	0.5	0.23	LSLC	LSSF
1	m	Family A	0.7	0.58	0.48	0.54	0.58	0.52	0.44	0.19	LSLC	LSSF
1	m	Family A	0.68	0.58	0.5	0.52	0.57	0.5	0.46	0.18	LSLC	LSLC
1	m	Family A	0.77	0.56	0.52	0.48	0.58	0.52	0.48	0.13	LSLC	LSLC
1	m	Family A	0.71	0.57	0.54	0.52	0.59	0.56	0.41	0.23	LSLC	LSSF
1	m	Family A	0.71	0.64	0.59	0.52	0.62	0.52	0.52	0.19	LSLC	LSSF
1	m	Family A	0.67	0.66	0.52	0.59	0.61	0.54	0.5	0.2	LSLC	LSSF
1	m	Family A	0.71	0.77	0.78	0.74	0.75	0.59	0.54	0.23	LSLC	LSSF
1	m	Family A	0.68	0.59	0.52	0.42	0.55	0.5	0.52	0.24	LSLC	LSSF
1	m	Family A	0.7	0.57	0.55	0.38	0.55	0.46	0.55	0.2	LSLC	LSSF
1	m	Family A	0.71	0.55	0.5	0.37	0.53	0.45	0.58	0.15	LSLC	LSLC
1	m	Family A	0.73	0.59	0.57	0.46	0.59	0.48	0.6	0.19	LSLC	LSLC
1	m	Family A	0.67	0.54	0.59	0.5	0.57	0.48	0.59	0.17	LSLC	LSLC
1	m	Family A	0.69	0.54	0.65	0.52	0.6	0.52	0.56	0.22	LSLC	LSSF
1	m	Family A	0.75	0.58	0.52	0.52	0.59	0.54	0.57	0.17	LSLC	LSLC
1	m	Family A	0.64	0.68	0.52	0.55	0.6	0.46	0.52	0.21	LSLC	LSSF
1	m	Family A	0.68	0.64	0.59	0.5	0.6	0.48	0.5	0.2	LSLC	LSSF
1	m	Family A	0.75	0.76	0.74	0.72	0.74	0.58	0.49	0.23	LSLC	LSSF
1	m	Family A	0.68	0.63	0.62	0.62	0.63	0.54	0.54	0.24	LSLC	LSSF
1	m	Family A	0.72	0.62	0.67	0.63	0.66	0.48	0.5	0.23	LSLC	LSSF
1	m	Family A	0.67	0.64	0.64	0.64	0.64	0.44	0.52	0.2	LSLC	LSSF
1	m	Family A	0.67	0.74	0.7	0.65	0.69	0.49	0.51	0.22	LSLC	LSSF
1	m	Family A	0.66	0.75	0.71	0.62	0.68	0.47	0.49	0.24	LSLC	LSSF
1	m	Family A	0.68	0.72	0.77	0.64	0.7	0.47	0.46	0.24	LSLC	LSSF
1	m	Family A	0.64	0.67	0.59	0.58	0.62	0.52	0.5	0.23	LSLC	LSSF
1	m	Family A	0.68	0.68	0.59	0.61	0.64	0.45	0.48	0.23	LSLC	LSSF
1	m	Family A	0.61	0.67	0.59	0.68	0.64	0.45	0.5	0.24	LSLC	LSSF
1	m	Family A	0.74	0.62	0.72	0.62	0.68	0.53	0.53	0.22	LSLC	LSSF
1	m	Family A	0.75	0.67	0.73	0.59	0.68	0.5	0.47	0.24	LSLC	LSSF
1	m	Family A	0.72	0.72	0.73	0.53	0.68	0.5	0.53	0.17	LSLC	LSLC
1	m	Family A	0.68	0.73	0.67	0.6	0.67	0.47	0.47	0.21	LSLC	LSSF
1	m	Family A	0.71	0.67	0.66	0.56	0.65	0.49	0.52	0.19	LSLC	LSSF
1	m	Family A	0.62	0.61	0.57	0.55	0.58	0.55	0.5	0.24	LSLC	LSSF
1	m	Family A	0.68	0.64	0.5	0.55	0.59	0.57	0.52	0.23	LSLC	LSSF
1	m	Family A	0.67	0.62	0.59	0.56	0.61	0.54	0.52	0.21	LSLC	LSSF
1	m	Family A	0.68	0.7	0.62	0.58	0.64	0.54	0.5	0.24	LSLC	LSSF
1	m	Family A	0.67	0.67	0.58	0.58	0.63	0.5	0.5	0.21	LSLC	LSSF
1	m	Family A	0.58	0.68	0.61	0.58	0.61	0.56	0.52	0.21	LSLC	LSSF
1	m	Family A	0.63	0.67	0.56	0.61	0.61	0.54	0.52	0.22	LSLC	LSSF
1	m	Family A	0.68	0.73	0.58	0.73	0.68	0.56	0.52	0.23	LSLC	LSSF
1	m	Family A	0.69	0.64	0.64	0.63	0.65	0.52	0.41	0.23	LSLC	LSSF
1	m	Family A	0.62	0.63	0.53	0.75	0.63	0.47	0.56	0.22	LSLC	LSSF
1	m	Family A	0.7	0.71	0.63	0.68	0.68	0.47	0.58	0.24	LSLC	LSSF
1	m	Family A	0.58	0.74	0.68	0.56	0.64	0.5	0.52	0.2	LSLC	LSSF
1	m	Family A	0.72	0.66	0.63	0.63	0.66	0.59	0.52	0.25	LSSF	LSSF
1	m	Family A	0.67	0.61	0.7	0.54	0.63	0.54	0.52	0.25	LSSF	LSSF
1	m	Family A	0.67	0.58	0.6	0.54	0.6	0.52	0.48	0.25	LSSF	LSSF
1	m	Family A	0.67	0.64	0.62	0.7	0.66	0.46	0.5	0.25	LSSF	LSSF
1	m	Family A	0.69	0.73	0.65	0.65	0.68	0.52	0.53	0.25	LSSF	LSSF
1	m	Family A	0.72	0.73	0.67	0.74	0.72	0.48	0.5	0.25	LSSF	LSSF
1	m	Family A	0.67	0.57	0.64	0.56	0.61	0.5	0.48	0.25	LSSF	LSSF
1	m	Family A	0.72	0.74	0.71	0.68	0.72	0.47	0.53	0.25	LSSF	LSSF
1	m	Family A	0.67	0.71	0.62	0.69	0.67	0.44	0.47	0.25	LSSF	LSSF
1	m	Family A	0.65	0.72	0.67	0.74	0.69	0.48	0.55	0.25	LSSF	LSSF
1	m	Family A	0.77	0.55	0.65	0.66	0.66	0.52	0.53	0.25	LSSF	LSSF
1	m	Family A	0.71	0.71	0.72	0.66	0.7	0.52	0.53	0.25	LSSF	LSSF
1	m	Family A	0.76	0.71	0.71	0.78	0.74	0.5	0.53	0.25	LSSF	LSSF
1	m	Family A	0.69	0.67	0.76	0.58	0.68	0.47	0.5	0.25	LSSF	LSSF
1	m	Family A	0.57	0.62	0.59	0.55	0.58	0.57	0.52	0.25	LSSF	LSSF
1	m	Family A	0.7	0.71	0.68	0.69	0.69	0.52	0.5	0.25	LSSF	LSSF
1	m	Family A	0.71	0.62	0.59	0.62	0.64	0.5	0.48	0.25	LSSF	LSSF
2	f	Family A	0.69	0.62	0.79	0.67	0.69	0.5	0.54	0.51	DSDC	TROT
2	f	Family A	0.67	0.65	0.85	0.68	0.71	0.5	0.52	0.51	DSDC	TROT
2	f	Family A	0.68	0.71	0.78	0.68	0.71	0.5	0.55	0.47	LSDC	TROT
2	f	Family A	0.68	0.7	0.81	0.74	0.73	0.48	0.6	0.48	LSDC	TROT
2	f	Family A	0.67	0.71	0.79	0.71	0.72	0.49	0.57	0.48	LSDC	TROT
2	f	Family A	0.67	0.73	0.84	0.75	0.75	0.49	0.58	0.43	LSDC	LSDC
2	f	Family A	0.68	0.67	0.77	0.76	0.72	0.49	0.53	0.47	LSDC	TROT
2	f	Family A	0.72	0.67	0.8	0.71	0.72	0.52	0.59	0.49	LSDC	TROT
2	f	Family A	0.59	0.73	0.86	0.87	0.76	0.46	0.5	0.48	LSDC	TROT
2	f	Family A	0.7	0.76	0.67	0.69	0.7	0.43	0.47	0.37	LSDC	LSDC
2	f	Family A	0.69	0.72	0.65	0.77	0.71	0.5	0.48	0.37	LSDC	LSDC
2	f	Family A	0.74	0.71	0.72	0.77	0.74	0.49	0.42	0.39	LSDC	LSDC
2	f	Family A	0.76	0.69	0.68	0.73	0.72	0.52	0.48	0.4	LSDC	LSDC
2	f	Family A	0.76	0.72	0.75	0.77	0.75	0.5	0.54	0.4	LSDC	LSDC
2	f	Family A	0.68	0.72	0.74	0.71	0.71	0.52	0.53	0.38	LSDC	LSDC
2	f	Family A	0.68	0.7	0.78	0.79	0.74	0.47	0.51	0.4	LSDC	LSDC
2	f	Family A	0.69	0.67	0.74	0.74	0.71	0.45	0.5	0.41	LSDC	LSDC
2	f	Family A	0.68	0.7	0.59	0.72	0.67	0.48	0.44	0.41	LSDC	LSDC
2	f	Family A	0.76	0.79	0.7	0.72	0.74	0.53	0.44	0.41	LSDC	LSDC
2	f	Family A	0.69	0.74	0.79	0.81	0.76	0.5	0.59	0.4	LSDC	LSDC
2	f	Family A	0.74	0.74	0.76	0.89	0.78	0.46	0.6	0.38	LSDC	LSDC
2	f	Family A	0.74	0.73	0.72	0.77	0.74	0.5	0.46	0.45	LSDC	TROT
2	f	Family A	0.64	0.62	0.7	0.71	0.66	0.44	0.48	0.37	LSDC	LSDC
2	f	Family A	0.68	0.58	0.71	0.65	0.66	0.52	0.52	0.42	LSDC	LSDC
2	f	Family A	0.64	0.63	0.7	0.73	0.68	0.48	0.46	0.44	LSDC	TROT
2	f	Family A	0.65	0.68	0.73	0.67	0.68	0.5	0.5	0.45	LSDC	TROT
2	f	Family A	0.68	0.77	0.74	0.88	0.77	0.47	0.42	0.41	LSDC	LSDC
2	f	Family A	0.6	0.69	0.88	0.8	0.74	0.47	0.57	0.34	LSDC	LSDC
2	f	Family A	0.69	0.72	0.68	0.75	0.71	0.53	0.49	0.4	LSDC	LSDC
2	f	Family A	0.68	0.67	0.74	0.73	0.7	0.5	0.48	0.45	LSDC	TROT
2	f	Family A	0.69	0.69	0.77	0.75	0.72	0.48	0.5	0.46	LSDC	TROT
2	f	Family A	0.72	0.76	0.66	0.83	0.74	0.47	0.53	0.39	LSDC	LSDC
2	f	Family A	0.67	0.75	0.77	0.82	0.75	0.46	0.5	0.37	LSDC	LSDC
2	f	Family A	0.7	0.75	0.67	0.88	0.75	0.48	0.44	0.43	LSDC	LSDC
2	f	Family A	0.64	0.7	0.7	0.72	0.69	0.48	0.55	0.39	LSDC	LSDC
2	f	Family A	0.64	0.71	0.73	0.75	0.7	0.47	0.53	0.4	LSDC	LSDC
2	f	Family A	0.7	0.69	0.71	0.77	0.72	0.48	0.55	0.42	LSDC	LSDC
2	f	Family A	0.69	0.7	0.69	0.66	0.68	0.5	0.48	0.41	LSDC	LSDC
2	f	Family A	0.72	0.67	0.74	0.71	0.71	0.5	0.52	0.4	LSDC	LSDC
2	f	Family A	0.67	0.69	0.83	0.76	0.73	0.52	0.55	0.41	LSDC	LSDC
2	f	Family A	0.68	0.67	0.78	0.8	0.73	0.51	0.47	0.41	LSDC	LSDC
2	f	Family A	0.69	0.7	0.72	0.78	0.72	0.57	0.56	0.41	LSDC	LSDC
2	f	Family A	0.64	0.73	0.72	0.62	0.68	0.47	0.5	0.4	LSDC	LSDC
2	f	Family A	0.71	0.73	0.82	0.64	0.73	0.5	0.59	0.39	LSDC	LSDC
2	f	Family A	0.7	0.72	0.81	0.83	0.77	0.53	0.41	0.4	LSDC	LSDC
2	f	Family A	0.69	0.71	0.77	0.72	0.72	0.5	0.47	0.46	LSDC	TROT
2	f	Family A	0.76	0.56	0.82	0.73	0.72	0.48	0.46	0.46	LSDC	TROT
2	f	Family A	0.61	0.67	0.88	0.75	0.73	0.55	0.5	0.37	LSDC	LSDC
2	f	Family A	0.68	0.81	0.79	0.76	0.76	0.48	0.53	0.45	LSDC	TROT
2	f	Family A	0.68	0.72	0.71	0.87	0.75	0.52	0.6	0.43	LSDC	LSDC
2	f	Family A	0.72	0.71	0.85	0.77	0.76	0.53	0.41	0.41	LSDC	LSDC
2	f	Family A	0.7	0.7	0.81	0.71	0.73	0.5	0.44	0.39	LSDC	LSDC
2	f	Family A	0.69	0.72	0.74	0.87	0.76	0.5	0.5	0.43	LSDC	LSDC
2	f	Family A	0.71	0.8	0.83	0.68	0.76	0.53	0.5	0.34	LSDC	LSDC
2	f	Family A	0.83	0.82	0.97	0.84	0.86	0.5	0.47	0.41	LSDC	LSDC
2	f	Family A	0.81	0.82	0.94	0.74	0.83	0.42	0.43	0.42	LSDC	LSDC
2	f	Family A	0.78	0.76	0.75	0.75	0.76	0.49	0.5	0.42	LSDC	LSDC
2	f	Family A	0.7	0.69	0.79	0.8	0.75	0.54	0.5	0.47	LSDC	TROT
2	f	Family A	0.76	0.74	0.8	0.78	0.77	0.56	0.45	0.44	LSDC	TROT
2	f	Family A	0.74	0.77	0.82	0.76	0.78	0.55	0.41	0.43	LSDC	LSDC
2	f	Family A	0.68	0.76	0.8	0.8	0.76	0.52	0.57	0.46	LSDC	TROT
2	f	Family A	0.81	0.73	0.86	0.82	0.81	0.56	0.47	0.45	LSDC	TROT
2	f	Family A	0.74	0.75	0.89	0.77	0.79	0.48	0.47	0.41	LSDC	LSDC
2	f	Family A	0.78	0.74	0.82	0.7	0.76	0.53	0.44	0.47	LSDC	TROT
2	f	Family A	0.75	0.76	0.81	0.79	0.78	0.52	0.49	0.47	LSDC	TROT
2	f	Family A	0.74	0.76	0.83	0.79	0.78	0.51	0.46	0.48	LSDC	TROT
2	f	Family A	0.76	0.71	0.82	0.83	0.78	0.57	0.41	0.47	LSDC	TROT
2	f	Family A	0.79	0.72	0.88	0.86	0.81	0.59	0.43	0.41	LSDC	LSDC
2	f	Family A	0.76	0.78	0.87	0.84	0.81	0.56	0.45	0.41	LSDC	LSDC
2	f	Family A	0.76	0.76	0.87	0.84	0.81	0.55	0.42	0.41	LSDC	LSDC
2	f	Family A	0.74	0.75	0.84	0.78	0.78	0.51	0.43	0.42	LSDC	LSDC
2	f	Family A	0.7	0.64	0.77	0.7	0.7	0.48	0.58	0.5	TROT	TROT
3	f	Family A	0.62	0.67	0.69	0.81	0.7	0.45	0.47	0.51	DSDC	TROT
3	f	Family A	0.72	0.73	0.76	0.64	0.71	0.45	0.45	0.34	LSDC	LSDC
3	f	Family A	0.68	0.7	0.77	0.83	0.74	0.49	0.48	0.39	LSDC	LSDC
3	f	Family A	0.76	0.69	0.77	0.82	0.76	0.51	0.5	0.42	LSDC	LSDC
3	f	Family A	0.74	0.62	0.73	0.78	0.72	0.53	0.55	0.38	LSDC	LSDC
3	f	Family A	0.68	0.63	0.6	0.72	0.66	0.53	0.48	0.35	LSDC	LSDC
3	f	Family A	0.63	0.63	0.55	0.75	0.64	0.52	0.5	0.3	LSDC	LSSF
3	f	Family A	0.71	0.65	0.59	0.65	0.65	0.48	0.48	0.3	LSDC	LSSF
3	f	Family A	0.71	0.71	0.63	0.7	0.69	0.54	0.5	0.33	LSDC	LSDC
3	f	Family A	0.69	0.68	0.7	0.7	0.69	0.45	0.55	0.38	LSDC	LSDC
3	f	Family A	0.67	0.59	0.72	0.67	0.66	0.5	0.52	0.36	LSDC	LSDC
3	f	Family A	0.76	0.55	0.72	0.79	0.71	0.41	0.59	0.4	LSDC	LSDC
3	f	Family A	0.75	0.63	0.75	0.7	0.71	0.52	0.55	0.38	LSDC	LSDC
3	f	Family A	0.73	0.8	0.83	0.71	0.77	0.51	0.48	0.33	LSDC	LSDC
3	f	Family A	0.74	0.78	0.7	0.7	0.73	0.53	0.55	0.35	LSDC	LSDC
3	f	Family A	0.7	0.69	0.97	0.84	0.8	0.55	0.42	0.47	LSDC	TROT
3	f	Family A	0.79	0.81	0.88	0.82	0.83	0.54	0.56	0.38	LSDC	LSDC
3	f	Family A	0.8	0.75	0.83	0.78	0.79	0.5	0.52	0.37	LSDC	LSDC
3	f	Family A	0.75	0.75	0.84	0.85	0.8	0.54	0.52	0.36	LSDC	LSDC
3	f	Family A	0.78	0.73	0.84	0.84	0.79	0.47	0.5	0.38	LSDC	LSDC
3	f	Family A	0.72	0.74	0.81	0.8	0.77	0.48	0.52	0.4	LSDC	LSDC
3	f	Family A	0.68	0.77	0.79	0.78	0.75	0.47	0.55	0.41	LSDC	LSDC
3	f	Family A	0.73	0.69	0.78	0.78	0.74	0.49	0.54	0.41	LSDC	LSDC
3	f	Family A	0.74	0.73	0.74	0.8	0.75	0.54	0.4	0.42	LSDC	LSDC
3	f	Family A	0.71	0.52	0.62	0.61	0.61	0.56	0.53	0.13	LSLC	LSLC
3	f	Family A	0.73	0.67	0.6	0.52	0.63	0.54	0.42	0.25	LSSF	LSSF
3	f	Family A	0.68	0.79	0.85	0.95	0.82	0.45	0.53	0.5	TROT	TROT
4	f	Family A	0.63	0.65	0.61	0.72	0.65	0.5	0.5	0.3	LSDC	LSSF
4	f	Family A	0.61	0.7	0.62	0.66	0.65	0.48	0.5	0.29	LSDC	LSSF
4	f	Family A	0.58	0.61	0.61	0.57	0.59	0.5	0.48	0.29	LSDC	LSSF
4	f	Family A	0.68	0.58	0.69	0.67	0.65	0.5	0.56	0.4	LSDC	LSDC
4	f	Family A	0.6	0.6	0.73	0.65	0.65	0.44	0.58	0.37	LSDC	LSDC
4	f	Family A	0.61	0.67	0.81	0.74	0.71	0.48	0.54	0.32	LSDC	LSDC
4	f	Family A	0.57	0.77	0.64	0.74	0.68	0.52	0.5	0.33	LSDC	LSDC
4	f	Family A	0.68	0.64	0.7	0.64	0.67	0.5	0.43	0.38	LSDC	LSDC
4	f	Family A	0.68	0.67	0.71	0.67	0.68	0.5	0.52	0.33	LSDC	LSDC
4	f	Family A	0.6	0.68	0.63	0.72	0.66	0.52	0.5	0.33	LSDC	LSDC
4	f	Family A	0.67	0.64	0.7	0.68	0.67	0.5	0.5	0.31	LSDC	LSSF
4	f	Family A	0.69	0.56	0.65	0.69	0.65	0.44	0.52	0.31	LSDC	LSSF
4	f	Family A	0.68	0.69	0.79	0.7	0.71	0.45	0.5	0.33	LSDC	LSDC
4	f	Family A	0.7	0.64	0.75	0.7	0.7	0.46	0.52	0.35	LSDC	LSDC
4	f	Family A	0.67	0.7	0.76	0.72	0.71	0.48	0.5	0.37	LSDC	LSDC
4	f	Family A	0.69	0.75	0.71	0.71	0.71	0.48	0.48	0.46	LSDC	TROT
4	f	Family A	0.68	0.73	0.76	0.7	0.72	0.48	0.52	0.4	LSDC	LSDC
4	f	Family A	0.65	0.72	0.7	0.75	0.7	0.5	0.5	0.42	LSDC	LSDC
4	f	Family A	0.69	0.72	0.75	0.74	0.72	0.53	0.45	0.45	LSDC	TROT
4	f	Family A	0.68	0.71	0.8	0.76	0.74	0.49	0.51	0.45	LSDC	TROT
4	f	Family A	0.62	0.78	0.79	0.79	0.75	0.54	0.48	0.48	LSDC	TROT
4	f	Family A	0.69	0.74	0.76	0.71	0.73	0.5	0.48	0.45	LSDC	TROT
4	f	Family A	0.66	0.72	0.75	0.7	0.71	0.52	0.59	0.49	LSDC	TROT
4	f	Family A	0.68	0.72	0.78	0.79	0.75	0.5	0.55	0.4	LSDC	LSDC
4	f	Family A	0.69	0.75	0.81	0.76	0.75	0.46	0.54	0.38	LSDC	LSDC
4	f	Family A	0.76	0.78	0.82	0.85	0.8	0.55	0.59	0.35	LSDC	LSDC
4	f	Family A	0.75	0.85	0.91	0.89	0.85	0.56	0.5	0.36	LSDC	LSDC
4	f	Family A	0.8	0.77	0.72	0.89	0.79	0.48	0.44	0.38	LSDC	LSDC
4	f	Family A	0.7	0.71	0.79	0.74	0.74	0.53	0.46	0.43	LSDC	LSDC
4	f	Family A	0.68	0.76	0.71	0.83	0.75	0.51	0.43	0.42	LSDC	LSDC
4	f	Family A	0.69	0.74	0.79	0.7	0.73	0.53	0.58	0.4	LSDC	LSDC
4	f	Family A	0.72	0.73	0.74	0.82	0.75	0.51	0.43	0.41	LSDC	LSDC
4	f	Family A	0.74	0.73	0.77	0.72	0.74	0.56	0.56	0.37	LSDC	LSDC
4	f	Family A	0.71	0.74	0.83	0.81	0.77	0.52	0.47	0.35	LSDC	LSDC
4	f	Family A	0.73	0.74	0.72	0.79	0.75	0.52	0.42	0.39	LSDC	LSDC
4	f	Family A	0.71	0.71	0.77	0.73	0.73	0.5	0.49	0.4	LSDC	LSDC
4	f	Family A	0.67	0.76	0.75	0.72	0.73	0.54	0.5	0.4	LSDC	LSDC
4	f	Family A	0.76	0.76	0.76	0.78	0.76	0.5	0.46	0.37	LSDC	LSDC
4	f	Family A	0.76	0.77	0.86	0.73	0.78	0.5	0.44	0.37	LSDC	LSDC
4	f	Family A	0.74	0.8	0.78	0.74	0.77	0.5	0.47	0.35	LSDC	LSDC
4	f	Family A	0.76	0.78	0.79	0.72	0.76	0.47	0.49	0.34	LSDC	LSDC
4	f	Family A	0.72	0.79	0.75	0.76	0.75	0.5	0.5	0.35	LSDC	LSDC
4	f	Family A	0.71	0.76	0.71	0.76	0.74	0.49	0.47	0.3	LSDC	LSSF
4	f	Family A	0.68	0.76	0.7	0.76	0.72	0.52	0.48	0.3	LSDC	LSSF
4	f	Family A	0.67	0.76	0.68	0.76	0.71	0.53	0.47	0.31	LSDC	LSDC
4	f	Family A	0.66	0.81	0.71	0.72	0.72	0.52	0.47	0.3	LSDC	LSSF
4	f	Family A	0.72	0.79	0.79	0.78	0.77	0.5	0.49	0.38	LSDC	LSDC
4	f	Family A	0.73	0.77	0.78	0.81	0.77	0.46	0.49	0.39	LSDC	LSDC
4	f	Family A	0.72	0.76	0.78	0.77	0.76	0.47	0.45	0.44	LSDC	TROT
4	f	Family A	0.69	0.76	0.75	0.78	0.75	0.46	0.48	0.39	LSDC	LSDC
4	f	Family A	0.72	0.75	0.76	0.73	0.74	0.45	0.5	0.43	LSDC	LSDC
4	f	Family A	0.69	0.78	0.78	0.78	0.76	0.48	0.5	0.41	LSDC	LSDC
4	f	Family A	0.7	0.79	0.78	0.76	0.76	0.48	0.43	0.39	LSDC	LSDC
4	f	Family A	0.72	0.79	0.74	0.69	0.74	0.49	0.5	0.34	LSDC	LSDC
4	f	Family A	0.74	0.73	0.74	0.78	0.75	0.44	0.47	0.37	LSDC	LSDC
4	f	Family A	0.74	0.76	0.77	0.72	0.75	0.49	0.49	0.39	LSDC	LSDC
4	f	Family A	0.77	0.78	0.79	0.8	0.78	0.46	0.45	0.4	LSDC	LSDC
4	f	Family A	0.62	0.76	0.77	0.78	0.73	0.52	0.5	0.38	LSDC	LSDC
4	f	Family A	0.68	0.74	0.75	0.82	0.75	0.46	0.43	0.36	LSDC	LSDC
4	f	Family A	0.69	0.69	0.76	0.69	0.71	0.45	0.48	0.41	LSDC	LSDC
4	f	Family A	0.67	0.73	0.79	0.73	0.73	0.43	0.5	0.36	LSDC	LSDC
4	f	Family A	0.67	0.75	0.73	0.68	0.71	0.46	0.48	0.39	LSDC	LSDC
4	f	Family A	0.7	0.63	0.72	0.65	0.67	0.46	0.48	0.31	LSDC	LSSF
4	f	Family A	0.69	0.72	0.73	0.76	0.73	0.45	0.44	0.37	LSDC	LSDC
4	f	Family A	0.68	0.7	0.68	0.67	0.68	0.48	0.52	0.35	LSDC	LSDC
4	f	Family A	0.56	0.74	0.67	0.85	0.7	0.46	0.58	0.4	LSDC	LSDC
4	f	Family A	0.72	0.72	0.61	0.69	0.68	0.48	0.52	0.37	LSDC	LSDC
4	f	Family A	0.59	0.79	0.62	0.78	0.69	0.52	0.5	0.34	LSDC	LSDC
4	f	Family A	0.63	0.72	0.65	0.74	0.68	0.52	0.56	0.41	LSDC	LSDC
4	f	Family A	0.65	0.76	0.75	0.82	0.74	0.55	0.53	0.37	LSDC	LSDC
4	f	Family A	0.71	0.68	0.72	0.74	0.71	0.52	0.52	0.37	LSDC	LSDC
4	f	Family A	0.69	0.71	0.74	0.75	0.72	0.52	0.52	0.33	LSDC	LSDC
4	f	Family A	0.64	0.73	0.68	0.73	0.7	0.52	0.54	0.37	LSDC	LSDC
4	f	Family A	0.57	0.79	0.7	0.75	0.7	0.54	0.54	0.36	LSDC	LSDC
4	f	Family A	0.65	0.68	0.71	0.68	0.68	0.46	0.5	0.35	LSDC	LSDC
4	f	Family A	0.63	0.71	0.67	0.64	0.66	0.5	0.48	0.33	LSDC	LSDC
5	f	Family A	0.77	0.8	0.71	0.8	0.77	0.59	0.41	0.33	LSDC	LSDC
5	f	Family A	0.78	0.79	0.72	0.68	0.74	0.5	0.45	0.34	LSDC	LSDC
5	f	Family A	0.74	0.76	0.69	0.69	0.72	0.46	0.52	0.32	LSDC	LSDC
5	f	Family A	0.78	0.73	0.72	0.74	0.74	0.49	0.5	0.44	LSDC	TROT
5	f	Family A	0.79	0.79	0.71	0.69	0.74	0.48	0.56	0.41	LSDC	LSDC
5	f	Family A	0.8	0.8	0.75	0.78	0.78	0.5	0.41	0.21	LSLC	LSSF
6	m	video in [13]	0.33	0.43	0.43	0.57	0.44	0.42	0.5	0.62	DSDC	DSDC
6	m	video in [13]	0.5	0.57	0.63	0.67	0.59	0.5	0.56	0.53	DSDC	TROT
6	m	video in [13]	0.57	0.57	0.63	0.67	0.61	0.57	0.56	0.39	LSDC	LSDC
6	m	video in [13]	0.5	0.57	0.86	0.67	0.65	0.43	0.43	0.5	TROT	TROT
7	m	video in [27]	0.76	0.82	0.87	0.85	0.82	0.48	0.43	0.43	LSDC	LSDC
